# Supplementary material for: Longitudinal analysis of PD-L1 expression in patients with relapsed NSCLC
Source: PubMed Central journal article supplement — J Immunother Cancer. 2024 Apr 11;12(4):e008592. doi: 10.1136/jitc-2023-008592 (PMC11015283; doi:10.1136/jitc-2023-008592), 2024-04-11
Supplement: jitc-2023-008592supp002.pdf [file jitc-2023-008592supp002.pdf]

**Supplemental Figure 1** Absolute percentage changes in PD-L1 expression from preoperative biopsy to surgical resection, from early stage disease (preoperative biopsy or surgical sample) to disease recurrence and maximum within-patient change during the course of disease.
